# Supplementary material for: “Skunky” Cannabis: Environmental Odor Troubleshooting and the “Need-for-Speed”
Source: PubMed Central journal article supplement — ACS Omega. 2022 May 12;7(23):19043–7. doi: 10.1021/acsomega.2c00517 (PMC9201892; doi:10.1021/acsomega.2c00517), 2022-05-12
Supplement: ao2c00517_si_001.pdf [file ao2c00517_si_001.pdf]

## Supplementary Material

### ‘Skunky’ Cannabis: Environmental Odor Troubleshooting and the ‘Need-for-Speed’

Jacek A. Koziel <sup>1\*</sup>, Alex Guenther <sup>2</sup>, William Vizuite <sup>2</sup>, Don W. Wright <sup>3\*</sup>, Anna Iwasinska <sup>4</sup>

<sup>1</sup> Department of Agricultural and Biosystems Engineering, Iowa State University, Ames, Iowa

<sup>2</sup> Byers Scientific, Bloomington, Indiana

<sup>3</sup> Don Wright & Associates, LLC, Georgetown, Texas

<sup>4</sup> Volatile Analysis Corporation, Grant, Alabama

\* Correspondence: <sup>1\*</sup> koziel@iastate.edu; Tel +1-515-294-4206; <sup>3\*</sup> dwright256@gmail.com; Tel +1-512-750-1047

**Table S1.** Chronological summary of uncovering the link between 321MBT and ‘skunky’ cannabis (C) /hemp (H) odor.

|   | <b>Date</b>  | <b>Item</b>                                                                                                                                                                                                                                                                                                                                                   | <b>Discovery &amp; Public Disclosure</b>                                                                     | <b>Cannabis (C) / hemp (H)</b> |
|---|--------------|---------------------------------------------------------------------------------------------------------------------------------------------------------------------------------------------------------------------------------------------------------------------------------------------------------------------------------------------------------------|--------------------------------------------------------------------------------------------------------------|--------------------------------|
| 1 | Dec 10, 2015 | Rice & Koziel published a <a href="#">peer-reviewed article</a> linking 5 chromatographic retention regions with 'skunky' odor emissions from cannabis; including the retention region for 321MBT. The 5 chromatographic retention regions were identified as to 'onion' / 'skunky' odor character by this MDGC-MS-Olfactometry based odor profiling research | 321MBT was not identified, but the article was peer-reviewed and published in open-access                    | C                              |
| 2 | Jan 21, 2020 | Abstrax Tech filed a Provisional Patent application                                                                                                                                                                                                                                                                                                           | <b>Discovery</b> of specific linking of 321MBT with the 'skunky' odor in cannabis. Not published; not public | C                              |
| 3 | Feb 10, 2020 | Abstrax Tech blog posted                                                                                                                                                                                                                                                                                                                                      | Posted online without reference to 321MBT, a.k.a. prenyl mercaptan                                           | C                              |
| 4 | Mar 09, 2020 | Abstrax Tech filed a Press Release                                                                                                                                                                                                                                                                                                                            | Posted online without reference to 321MBT, a.k.a. prenyl mercaptan                                           | C                              |
| 5 | Apr 06, 2020 | Abstrax Tech filed Provisional Patent application                                                                                                                                                                                                                                                                                                             | <b>Discovery</b> of specific linking of 321MBT with the 'skunky' odor in cannabis. Not published; not public | C                              |

|    |              |                                                                                                                                                                                                                                                                                                                                                                          |                                                                                                                                  |                |
|----|--------------|--------------------------------------------------------------------------------------------------------------------------------------------------------------------------------------------------------------------------------------------------------------------------------------------------------------------------------------------------------------------------|----------------------------------------------------------------------------------------------------------------------------------|----------------|
| 6  | Oct 09, 2020 | Interim Report to Byers Scientific                                                                                                                                                                                                                                                                                                                                       | <b>Discovery</b> of specific linking of 321MBT with the 'skunky' odor in industrial hemp. Not published; not public              | <b>H</b>       |
| 7  | Jan 21, 2021 | Abstrax Tech filed a formal Patent Application with USPTO                                                                                                                                                                                                                                                                                                                | Not published; not public                                                                                                        | <b>C</b>       |
| 8  | Feb 03, 2021 | Abstrax Tech filed a formal Patent Application with USPTO                                                                                                                                                                                                                                                                                                                | Not published; not public                                                                                                        | <b>C</b>       |
| 9  | Mar 22, 2021 | Byers / Koziel et al. file a formal press release specifically linking 321MBT with the 'skunky' odor of cannabis                                                                                                                                                                                                                                                         | <b>Public disclosure;</b> published online and date stamped                                                                      | <b>C and H</b> |
| 10 | Apr 19, 2021 | Koziel et al. submitted and presented a Plenary Lecture at the NOSE 2020 International Conference on Environmental Odour Monitoring and Control. The 321MBT priority link with the 'skunky' odor of industrial hemp and cannabis was presented as a detailed case study, illustrating the application of odorant prioritization; the invited subject of the presentation | Not published, but date stamped and presented to conference participants                                                         | <b>C and H</b> |
| 11 | Apr 21, 2021 | Danielle Gehr. Ames Tribune. <i>Why does cannabis smell like skunk? This Iowa State professor has answers.</i>                                                                                                                                                                                                                                                           | Published and date stamped; refers to the March 22, 2021 Press Release and the Rice & Koziel, 2015 peer-reviewed published paper | <b>C and H</b> |
| 12 | Apr 23, 2021 | Koziel et al. uploaded NOSE 2021 Plenary Lecture conference presentation to the ASTM D-22.05 (Indoor Air Quality) subcommittee, WK72782 Workgroup support file repository                                                                                                                                                                                                | Not published, but date stamped; presented to the ASTM D-22.05 (Indoor Air Quality) subcommittee members                         | <b>C and H</b> |
| 13 | Jun 22, 2021 | Chane Leigh. Veriheal. <i>Researchers May Have Discovered the Cause of the Skunky Smell from Cannabis.</i>                                                                                                                                                                                                                                                               | Published and date stamped, refers to Gehr article                                                                               | <b>C and H</b> |

|    |              |                                                                                                                                                                                                                                                                                               |                                                         |                |
|----|--------------|-----------------------------------------------------------------------------------------------------------------------------------------------------------------------------------------------------------------------------------------------------------------------------------------------|---------------------------------------------------------|----------------|
| 14 | Aug 19, 2021 | USPTO publication of Abstrax Tech Patent Application US 2021/0253976A1                                                                                                                                                                                                                        | <b>Public disclosure.</b><br>Published and date stamped | <b>C</b>       |
| 15 | Aug 19, 2021 | USPTO publication of Abstrax Tech Patent Application US 2021/0251268A1                                                                                                                                                                                                                        | <b>Public disclosure.</b><br>Published and date stamped | <b>C</b>       |
| 16 | Nov 12, 2021 | Oswald et al. published the comprehensive article describing the discovery in ACS Omega (ACS Omega 2021, 6, 47, 31667–31676)                                                                                                                                                                  | Peer-reviewed and published online                      | <b>C</b>       |
| 17 | Jan 25, 2022 | Koziel et al. submitted a Viewpoint (this article) to ACS Omega highlighting: (1) the chronology of discovery and public disclosure relative to 321MBT and ‘skunky’ cannabis/hemp odor; (2) simpler and faster approach for uncovering links between priority odorants and chemical emissions | This Viewpoint                                          | <b>C and H</b> |
